# Supplementary material
Source: PubMed Central journal article supplement (PMC1857259)
Supplement: JCI0730558sd.pdf [file JCI0730558sd.pdf]

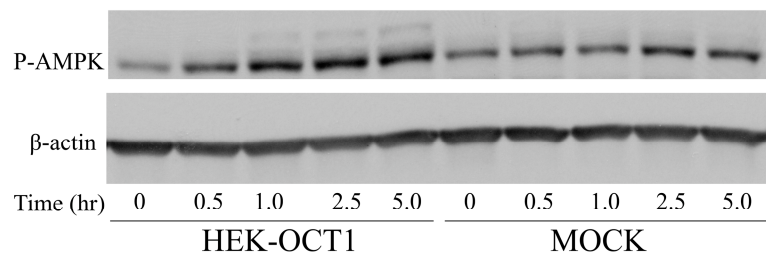

Supplemental Fig 1

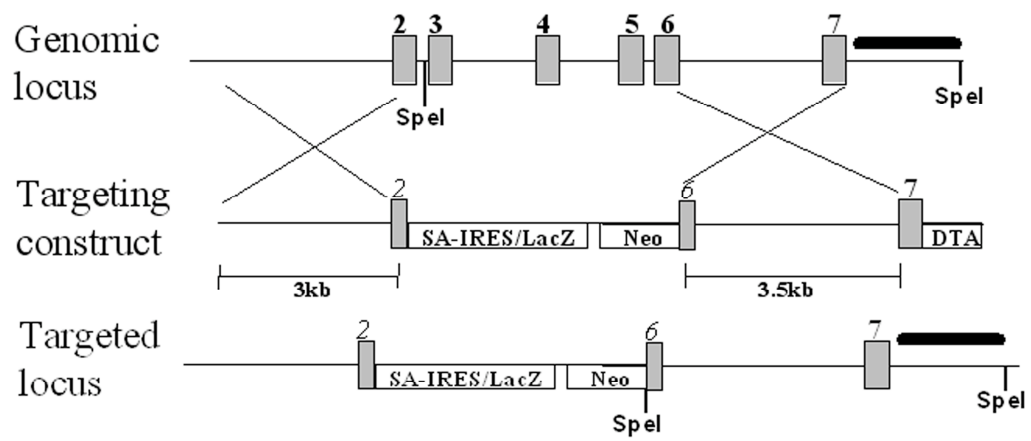

Supplemental Fig2

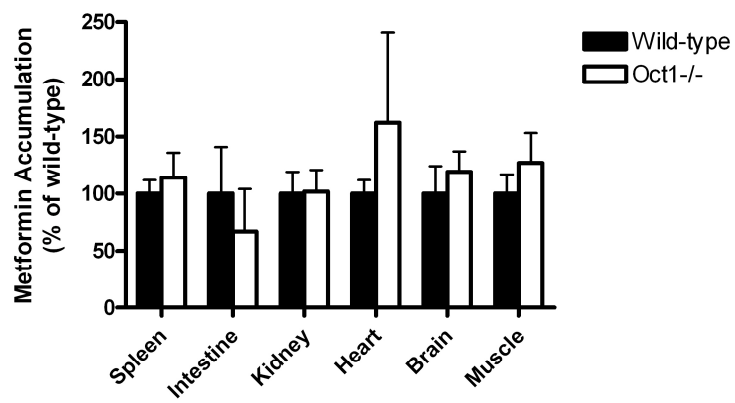

Supplemental Fig3

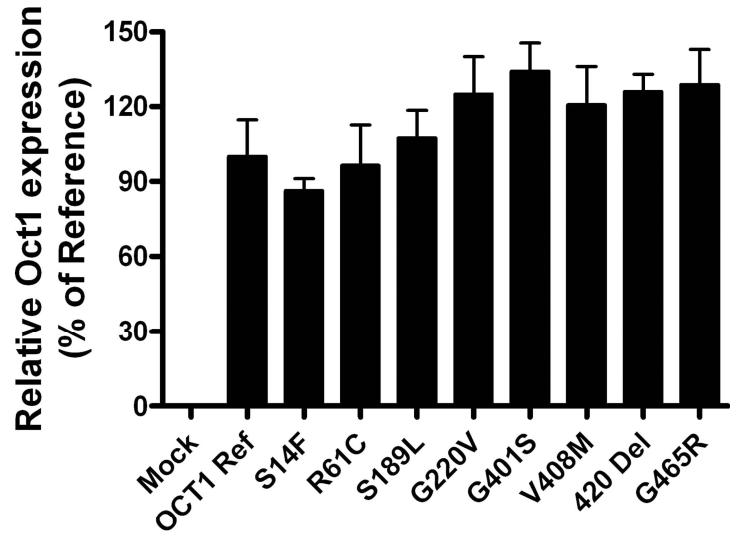

Supplemental Fig4



## SUPPLEMENTAL FIGURES AND TABLES

**Figure 1** Time-dependent AMPK phosphorylation in HEK-OCT1 cells and mock cells. The cells were treated with metformin (250  $\mu$ M) for 0 – 5.0 hours. Cell extracts were detected with polyclonal antibodies against phospho-AMPK $\alpha$  (Thr172) (top) and  $\beta$ -actin (bottom) respectively.

**Figure 2** Targeted disruption of the *Oct1* gene by homologous recombination. The exons 2 - 7 are shown. The strategy results in the complete deletion of exons 3-5 and partial deletion of exons 2 and 6. 5' and 3' homology arms (3kb and 3.5kb respectively) were cloned by proof-reading PCR and placed either side of the IRES-lacZ expression cassette and positive selection cassette to generate the targeting construct. The deleted region is replaced with an IRES-LacZ expression cassette and a positive selection cassette containing the neomycin phosphotransferase gene driven by the PGK promoter. Homologous recombination in neomycin resistant ES cells was confirmed by Southern blot of SpeI digested genomic DNA using a 3' external probe (black bar) which detects 8kb and 6kb bands at the wild-type and targeted locus respectively. Homologous recombination at the 5' end was confirmed in these ES cell clones by Southern blot and both ends were reconfirmed by PCR using primers external to the targeting construct.

**Figure 3** Metformin accumulation in different tissues of *Oct1*<sup>+/+</sup> and *Oct1*<sup>-/-</sup> mice. The mice (n = 4 per group) were sacrificed 1 hour after the oral dose (15 mg/kg), and the tissues were removed immediately. The radioactivity in tissue homogenates was counted

and converted to mass amount. Data represent mean  $\pm$  SD. Liver is not shown here (See Figure 5B in the paper)

**Figure 4** *OCT1* transcript levels in cell lines stably expressing human OCT1 and its variants as determined by RT-PCR. The total RNA amount of OCT1 reference and all the variants was similar with a remarkable increase over mock transfected cells. Data are expressed as mean  $\pm$  SD for samples analyzed in triplicate.

**Figure 5** Phosphorylation of AMPK and ACC in HEK cells of OCT1-reference, R61C and 420del treated with different concentrations of metformin. The cells were treated with the indicated concentrations of metformin for one hour, washed with blank medium, and then incubated for five hours before harvest. Immunoblots were performed against phospho-ACC (Ser 79), phospho-AMPK $\alpha$  (Thr172), AMPK $\alpha$ , and  $\beta$ -actin respectively.

**Table 1** Effect of metformin on glucose levels following oral glucose tolerance tests in healthy human volunteers with different *OCT1* genotypes.†

| Genotype           | Subject | Glucose AUC (min·mg/dL) |                    | C <sub>30min</sub> (mg/dL) |                  | C <sub>max</sub> (mg/dL) |                  |
|--------------------|---------|-------------------------|--------------------|----------------------------|------------------|--------------------------|------------------|
|                    |         | w/o Met                 | w/ Met             | w/o Met                    | w/ Met           | w/o Met                  | w/ Met           |
| OCT1-<br>reference | 1       | 21000                   | 18700              | 130                        | 97               | 141                      | 121              |
|                    | 3       | 17700                   | 15900              | 128                        | 104              | 130                      | 104              |
|                    | 4       | 22000                   | 17400              | 119                        | 112              | 140                      | 112              |
|                    | 7       | 20000                   | 20000              | 155                        | 127              | 156                      | 127              |
|                    | 9       | 20600                   | 20900              | 180                        | 106              | 180                      | 156              |
|                    | 10      | 17900                   | 17300              | 120                        | 114              | 120                      | 116              |
|                    | 12      | 19500                   | 17700              | 150                        | 116              | 150                      | 116              |
|                    | 16      | 19400                   | 18300              | 110                        | 125              | 143                      | 138              |
|                    | Average | 19800                   | 18300 <sup>a</sup> | 137                        | 113 <sup>a</sup> | 145                      | 124 <sup>a</sup> |
|                    | SD      | 1500                    | 1600               | 23.3                       | 10.3             | 18.0                     | 16.5             |
| OCT1-<br>Variant   | 2       | 19900                   | 21200              | 162                        | 129              | 162                      | 138              |
|                    | 6       | 19700                   | 20200              | 126                        | 126              | 168                      | 126              |
|                    | 8       | 21300                   | 19900              | 122                        | 115              | 157                      | 126              |
|                    | 11      | 21400                   | 23500              | 170                        | 108              | 170                      | 164              |
|                    | 14      | 25100                   | 26400              | 164                        | 128              | 207                      | 168              |
|                    | 15      | 17500                   | 19600              | 129                        | 111              | 133                      | 130              |
|                    | 17      | 20600                   | 20300              | 170                        | 150              | 170                      | 150              |
|                    | 19      | 17400                   | 17400              | 125                        | 114              | 125                      | 116              |



|         |       |                      |      |                    |      |                  |
|---------|-------|----------------------|------|--------------------|------|------------------|
| 20      | 16400 | 20900                | 139  | 153                | 143  | 164              |
| 21      | 17500 | 21200                | 110  | 128                | 110  | 142              |
| 13      | 18700 | 22700                | 150  | 148                | 150  | 160              |
| 18      | 22400 | 23100                | 154  | 114                | 166  | 144              |
| Average | 19800 | 21400 <sup>a,b</sup> | 143  | 127 <sup>a,b</sup> | 155  | 144 <sup>b</sup> |
| SD      | 2500  | 2300                 | 20.9 | 15.8               | 25.4 | 17.4             |

---

†The demographic characteristics and genotype for each volunteer are presented in Table 3. Glucose AUC: the area under the time-plasma glucose concentrations curve; C<sub>30min</sub>: the plasma glucose concentration 30 minutes after glucose administration; C<sub>max</sub>: the maximal plasma glucose concentration after glucose administration; w/o Met: without metformin treatment; w/ Met: with metformin treatment. <sup>a</sup>*P* < 0.05 vs. without metformin treatment (paired *Student's t*-test); <sup>b</sup>*P* < 0.05 vs. OCT1-reference (unpaired *Student's t*-test).

**Table 2** The characteristics and *OCT1* polymorphisms of human healthy volunteers in the clinical study.

| Subject No. | Polymorphism <sup>a</sup>  | Body Weight<br>(kg) | Height<br>(cm) | Age<br>(year) | Gender <sup>d</sup> |
|-------------|----------------------------|---------------------|----------------|---------------|---------------------|
| 1           | Reference                  | 82.1                | 186            | 28            | M                   |
| 3           | Reference                  | 58.7                | 169            | 36            | F                   |
| 4           | Reference                  | 67                  | 175            | 25            | M                   |
| 7           | Reference                  | 64.7                | 162            | 40            | F                   |
| 9           | Reference                  | 82.2                | 185            | 36            | M                   |
| 10          | Reference                  | 76.6                | 179            | 31            | M                   |
| 12          | Reference                  | 68.2                | 177            | 27            | F                   |
| 16          | Reference                  | 52.2                | 171            | 27            | F                   |
| Subtotal    |                            | 68.9 ± 10.8         | 176 ± 8.1      | 31.3 ± 5.4    | 4M, 4F              |
| 2           | R61C                       | 102                 | 188            | 35            | M                   |
| 6           | G401S                      | 80                  | 184            | 34            | M                   |
| 8           | R61C <sup>b</sup>          | 97.1                | 186.3          | 27            | M                   |
| 11          | R61C                       | 60.9                | 163            | 34            | F                   |
| 13          | 420Del                     | 67.9                | 173            | 35            | F                   |
| 14          | G465R,420Del               | 66.3                | 160            | 26            | F                   |
| 15          | G465R,420Del               | 74.2                | 159            | 26            | F                   |
| 17          | R61C                       | 75.1                | 186            | 27            | M                   |
| 18          | G174S <sup>c</sup> ,420Del | 79.1                | 168            | 40            | F                   |

|          |              |             |            |            |        |
|----------|--------------|-------------|------------|------------|--------|
| 19       | G465R,420Del | 62.2        | 162        | 32         | F      |
| 20       | G401S        | 69          | 183        | 25         | M      |
| 21       | G401S        | 55.4        | 157        | 19         | F      |
| Subtotal |              | 74.1 ± 14.0 | 173 ± 12.3 | 30.0 ± 5.9 | 6M, 6F |

---

<sup>a</sup>Individuals who carried any of the four polymorphisms, OCT1-R61C, OCT1-G401S, OCT1-420del and OCT1-G465R, are referred to as individuals with an OCT1-variant, and those who had the reference allele at all four positions are termed individuals with OCT1-reference alleles. Except subject 8, all other subjects were heterozygotes for the polymorphisms studied.

<sup>b</sup>Homozygote for R61C.

<sup>c</sup>Found in a volunteer after re-sequencing, and not determined on the cellular phenotype of OCT1 function (MPP<sup>+</sup> and metformin uptake).

<sup>d</sup>M: male; F: female

**Table 3** Primers used in RT-PCR to detect OCT1, OCT2 and GAPDH.

| Gene  | Species | Primers (5'→ 3')                 |
|-------|---------|----------------------------------|
| OCT1  | Mouse   | Sense: TTGGAGAGTTTGGCTGGTTC      |
|       |         | Anti-sense: CACCAGGAGGCAGAGCTTAC |
|       | Rat     | Sense: TTGGAGAGTTTGGCTGGTTC      |
|       |         | Anti-sense: CACCAAGAGACAGAGCTTAC |
|       | Human   | Sense: CTGTGTAGACCCCCTGGCTA      |
|       |         | Anti-sense: GTGTAGCCAGCCATCCAG   |
| OCT2  | Mouse   | Sense: AACCTTCGTTCTGGACTT        |
|       |         | Anti-sense: GTTGACCAGGCAGACCATTT |
|       | Rat     | Sense: CTCAGCCAGTGCATGAGGTA      |
|       |         | Anti-sense: AAAGCGAAACACCAACATCC |
|       | Human   | Sense: CCTGGTATGTGCCAACTCCT      |
|       |         | Anti-sense: CACCAGGAGCCCAACTGTAT |
| GAPDH | Mouse   | Sense: GGGTGTGAACCACGAGAAATATG   |
|       |         | Anti-sense: GAAGGCCATGCCAGTGAGC  |
|       | Rat     | Sense: GGGTGTGAACCACGAGAAATATG   |
|       |         | Anti-sense: GAAGGCCATGCCAGTGAGC  |
|       | Human   | Sense: AATCCCATCACCATCTTCCA      |
|       |         | Anti-sense: TGTGGTCATGAGTCCTTCCA |
